# Supplementary material for: Methanolic Extracts of D. viscosa Specifically Affect the Cytoskeleton and Exert an Antiproliferative Effect on Human Colorectal Cancer Cell Lines, According to Their Proliferation Rate
Source: MDPI journal article supplement (doi:10.3390/ijms241914920), 2023-10-05
Supplement: s1 [file s1]

# Methanolic extracts of *D. viscosa* specifically affects cytoskeleton and exerts its antiproliferative effect on human colorectal cancer cell lines, accordingly to their proliferation rate

Chiara Anglana <sup>1†</sup>, Makarena Rojas <sup>1†</sup>, Chiara Roberta Girelli <sup>1</sup>, Fabrizio Barozzi <sup>1</sup>, Josefa Quiroz-Troncoso <sup>2</sup>, Nicolás Alegría-Aravena <sup>2,3</sup>, Anna Montefusco <sup>1</sup>, Miriana Durante <sup>4</sup>, Francesco Paolo Fanizzi <sup>1</sup>, Carmen Ramírez-Castillejo <sup>2</sup> and Gian-Pietro Di Sansebastiano <sup>1</sup>

**Supplementary Table S1.** *p*-value of the comparison between the treated cells lines shown in **Figure 6**

| Treatment          | Concentration (µg/mL) | Comparison  | <i>p</i> -value |
|--------------------|-----------------------|-------------|-----------------|
| Hexanic extract    | 60                    | DLD-1/HT-29 | <0.05           |
| Hexanic extract    | 60                    | HT-29/SW480 | <0.05           |
| Hexanic extract    | 90                    | SW480/SW620 | <0.05           |
| Hexanic extract    | 180                   | DLD-1/SW620 | <0.01           |
| Methanolic extract | 50                    | SW480/SW620 | <0.0001         |
| Methanolic extract | 100                   | SW480/SW620 | <0.05           |
| Methanolic extract | 150                   | HT-29/SW480 | <0.01           |
| Methanolic extract | 150                   | SW480/SW620 | <0.01           |
| Aqueous extract    | 400                   | SW480/SW620 | <0.01           |
| Aqueous extract    | 500                   | DLD-1/SW620 | <0.0001         |
| Aqueous extract    | 500                   | HT-29/SW620 | <0.0001         |
| Aqueous extract    | 500                   | SW480/SW620 | <0.0001         |
| Aqueous extract    | 600                   | SW480/SW620 | <0.01           |
| Aqueous extract    | 1000                  | DLD-1/SW480 | <0.01           |
| Aqueous extract    | 1000                  | DLD-1/SW620 | <0.0001         |
| Aqueous extract    | 1000                  | HT-29/SW480 | <0.0001         |
| Aqueous extract    | 1000                  | HT-29/SW620 | <0.0001         |
| Aqueous extract    | 1000                  | SW480/SW620 | <0.01           |
| Aqueous extract    | 1500                  | DLD-1/SW480 | <0.01           |
| Aqueous extract    | 1500                  | DLD-1/SW620 | <0.001          |
| Aqueous extract    | 1500                  | HT-29/SW480 | <0.0001         |
| Aqueous extract    | 1500                  | HT-29/SW620 | <0.0001         |
| Aqueous extract    | 2000                  | DLD-1/SW480 | <0.05           |
| Aqueous extract    | 2000                  | DLD-1/SW620 | <0.01           |
| Aqueous extract    | 2000                  | HT-29/SW480 | <0.01           |
| Aqueous extract    | 2000                  | HT-29/SW620 | <0.01           |
| Aqueous extract    | 2500                  | DLD-1/SW620 | <0.05           |
| Aqueous extract    | 3000                  | DLD-1/SW480 | <0.0001         |
| Aqueous extract    | 3000                  | DLD-1/SW620 | <0.0001         |
| Aqueous extract    | 3000                  | HT-29/SW480 | <0.01           |

**Supplementary Table S2.** IC50 values of each cell line exposed under different treatments.

| Treatment          | Cell line | IC50 Concentration<br>( $\mu\text{g/mL}$ ) | Statistical error |
|--------------------|-----------|--------------------------------------------|-------------------|
| Aqueous extract    | DLD-1     | 1923                                       | $\pm 139$         |
| Aqueous extract    | HT-29     | 1865                                       | $\pm 58$          |
| Aqueous extract    | SW480     | 1031                                       | $\pm 25$          |
| Aqueous extract    | SW620     | 405                                        | $\pm 74$          |
| Hexanic extract    | DLD-1     | 159                                        | $\pm 13$          |
| Hexanic extract    | HT-29     | 126                                        | $\pm 17$          |
| Hexanic extract    | SW480     | 128                                        | $\pm 11$          |
| Hexanic extract    | SW620     | 87                                         | $\pm 13$          |
| Methanolic extract | DLD-1     | 142                                        | $\pm 2$           |
| Methanolic extract | HT-29     | 15                                         | $\pm 2$           |
| Methanolic extract | SW480     | 122                                        | $\pm 2$           |
| Methanolic extract | SW620     | 66                                         | $\pm 2$           |
